# Supplementary material for: Extracellular Vesicles from Naegleria fowleri Induce IL-8 Response in THP-1 Macrophage
Source: Pathogens. 2022 May 30;11(6):632. doi: 10.3390/pathogens11060632 (PMC9231210; doi:10.3390/pathogens11060632)
Supplement: Supplementary file 1 [file pathogens-11-00632-s001.zip › pathogens-1713694-supplementary.pdf]

## Supplementary Materials

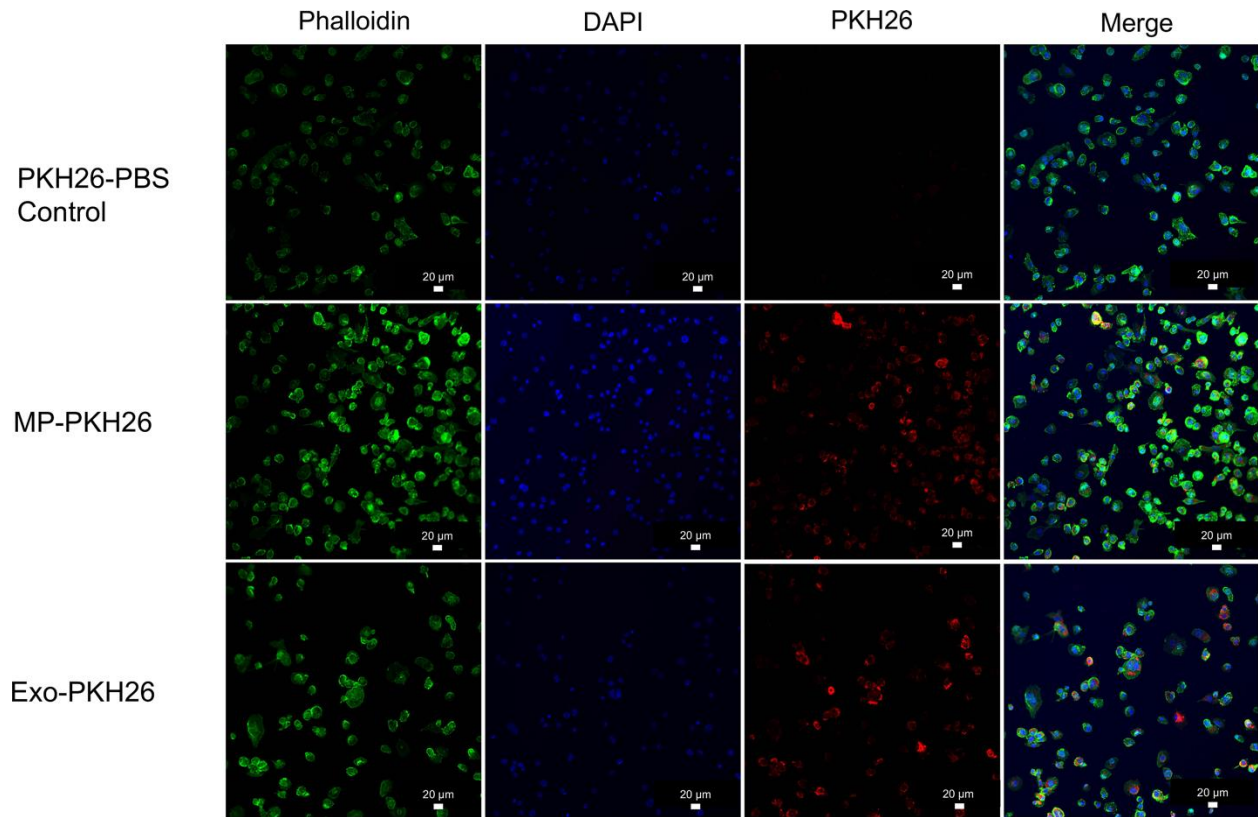

**Supplementary Figure S1.** Representative confocal microscopic images showing the internalization of *Nf*-EVs by THP-1 macrophages. THP-1 macrophages were cocultured with PKH26-labeled *Nf*-MP (MP-PKH26; 85  $\mu$ g/mL), or PKH26-labeled *Nf*-Exo (Exo-PKH26; 33  $\mu$ g/mL), or in the absence of EVs (PKH26-PBS control) for 2 h in an 8-wells chamber slide. Blue: Nucleus stained with DAPI., Red: PKH26-labeled *Nf*-EVs, Green: F-actin stained with Phalloidin, Scale bar represents 20  $\mu$ m.

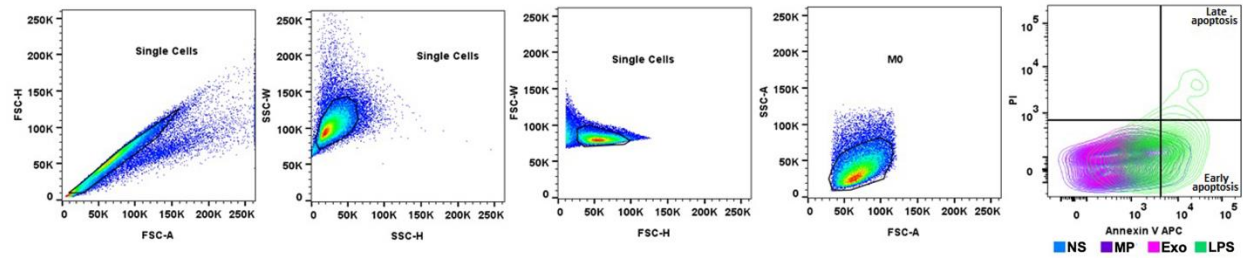

**Supplementary Figure S2.** Gating strategy of apoptosis on macrophages treated with *Nf*-EVs using Annexin V and PI staining.

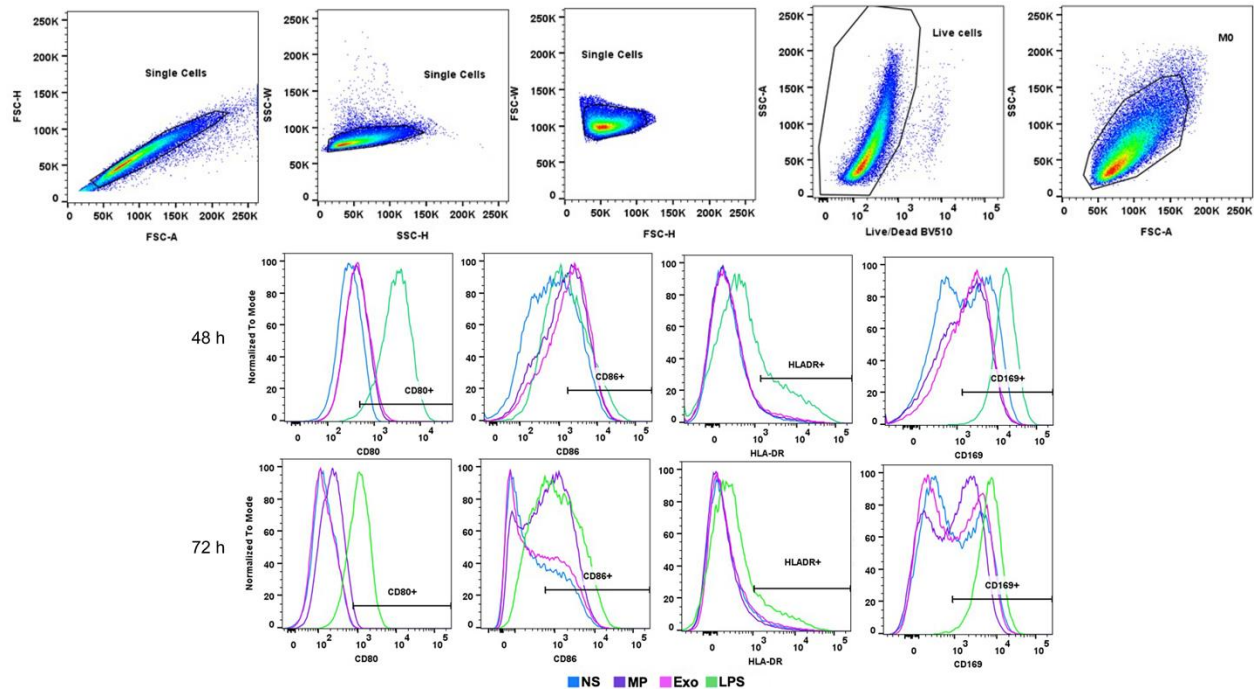

**Supplementary Figure S3.** Gating strategy showing CD80, CD86, HLA-DR, and CD169 expression on macrophages treated with *Nf*-EVs. Singlet cells were gated based on FSC-H/FSC-A, SSC-W/SSC-H and FSC-W/FSC-H, then Zombie negative live cells were gated in. Representative histogram plots showing expression markers on macrophages treated with *Nf*-EVs. Light blue histograms correspond to the non-stimulated cells, purple histograms correspond to the *Nf*-MP treated cells, pink histograms correspond to the *Nf*-Exo treated cells, and green histograms correspond to LPS treated cells.

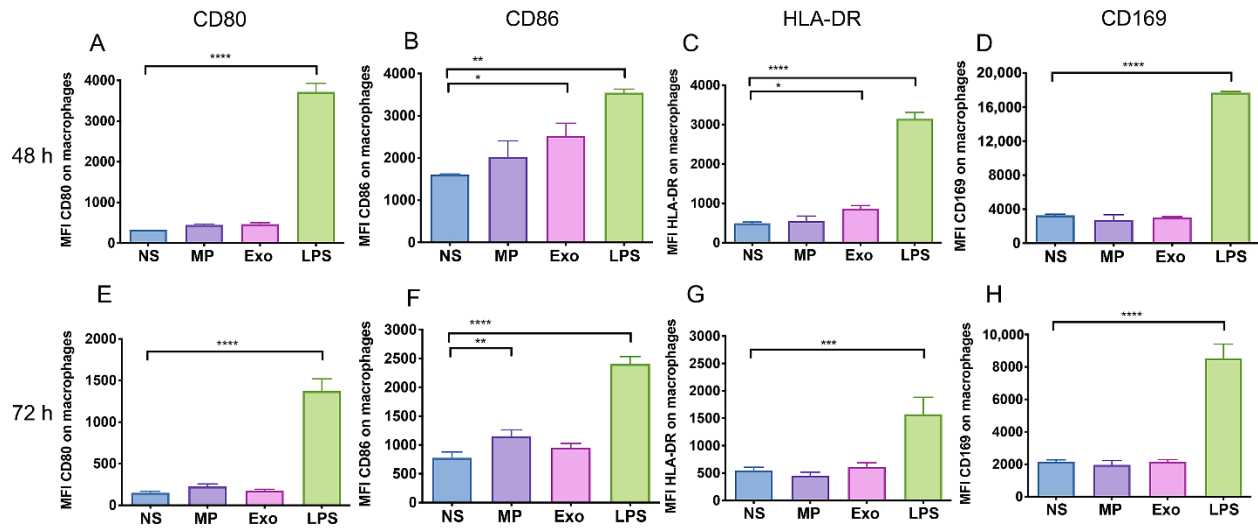

**Supplementary Figure S4.** Effect of *Nf*-MP and *Nf*-Exo on MFI of expression markers of macrophages. Macrophages were co-cultured with 20  $\mu$ g/mL *Nf*-MP or *Nf*-Exo or 25 ng/mL LPS for 48 h (upper panel) and 72 h (lower panel). LPS served as the positive control. The MFI of CD80, CD86, HLA-DR, and CD169 on macrophages were analyzed by flow cytometry. Data are mean  $\pm$  SD from three independent experiments. Statistical analysis was performed by one-way ANOVA with Tukey's post hoc test. (\*  $p < 0.05$ , \*\*  $p < 0.01$ , \*\*\*  $p < 0.001$  and \*\*\*\*  $p < 0.0001$ )

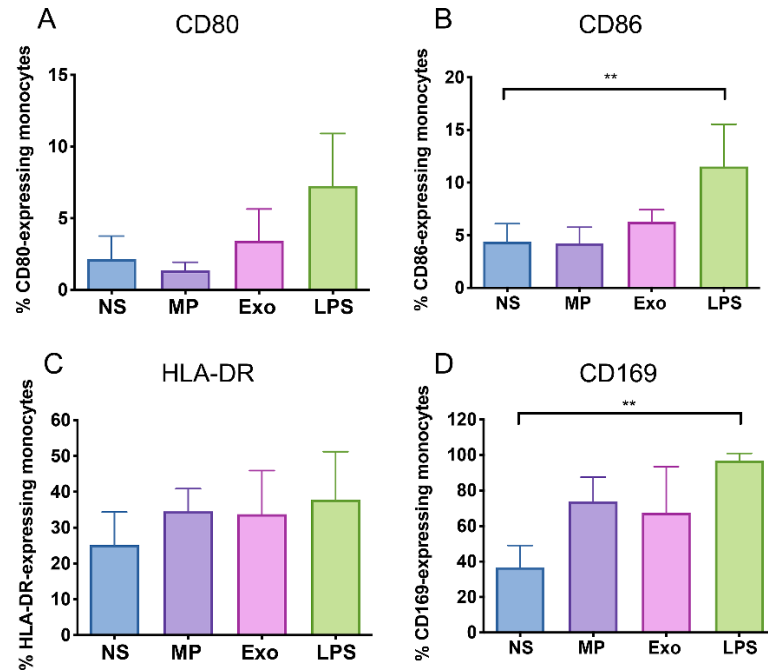

**Supplementary Figure S5.** Effect of *Nf*-MP and *Nf*-Exo on expression markers of THP-1 monocytes. THP-1 monocytes were cocultured with 20  $\mu$ g/mL *Nf*-MP or *Nf*-Exo or LPS 25 ng/mL for 48 h. LPS served as the positive control. The frequencies of CD80, CD86, HLA-DR, and CD169 on THP-1 monocytes were analyzed by flow cytometry. Data are mean  $\pm$  SD from three independent experiments. Statistical analysis was performed by one-way ANOVA with Tukey's post hoc test. (\*\*  $p < 0.01$ )
